# Supplementary material for: Determination of Exosome Mitochondrial DNA as a Biomarker of Renal Cancer Aggressiveness
Source: MDPI journal article supplement (doi:10.3390/cancers14010199), 2021-12-31
Supplement: s1 [file s1]

The flowchart illustrates the plasma fractionation protocol. It begins with a blood sample, which is centrifuged at 1,400 x g for 10 minutes at 4°C. The plasma is then stored at -80°C. The remaining cells are centrifuged at 15,000 x g for 30 minutes at 4°C. The supernatant is then centrifuged at 16,000 x g for 20 minutes at 4°C. The supernatant is then centrifuged at 120,000 x g for 2 hours at 4°C. The final fractions are labeled B, C, D, E, and F.

The figure consists of two bar charts. The left chart shows the median mtDNA copy number (HV-Short) for Controls and Cases across phases B (blue) and C (green). The right chart shows the median mtDNA copy number for Controls and Cases across phases D (orange), E (purple), and F (yellow). Both charts include error bars representing the 95% CI.

**Median mtDNA Copy Number (HV-Short)**

| Group    | Phase | Median mtDNA Copy Number (HV-Short) | 95% CI          |
|----------|-------|-------------------------------------|-----------------|
| Controls | B     | ~500                                | ~0 - 1,200      |
|          | C     | ~1,200                              | ~800 - 2,000    |
| Cases    | B     | ~1,200                              | ~200 - 2,400    |
|          | C     | ~9,000                              | ~3,800 - 13,800 |

**Median mtDNA Copy Number (HV-Short)**

| Group    | Phase | Median mtDNA Copy Number (HV-Short) | 95% CI         |
|----------|-------|-------------------------------------|----------------|
| Controls | D     | ~50                                 | ~0 - 200       |
|          | E     | ~300                                | ~100 - 600     |
|          | F     | ~2,200                              | ~1,200 - 2,600 |
| Cases    | D     | ~400                                | ~0 - 600       |
|          | E     | ~1,500                              | ~800 - 2,500   |
|          | F     | ~3,600                              | ~3,300 - 9,800 |

Error bars: 95% CI

**Figure S2.** Bar chart representation of mtDNA copy number variation of mitochondrial hypervariable region 1 (*HVI*) short gene among controls and cases comparing phases.

**Table S1.** Sequences of designed primers.

| Region     | Short Fragment (75–100 pb)         | Long Fragment (175–200 pb)          |
|------------|------------------------------------|-------------------------------------|
| <i>HBB</i> | F: 5'-GCATAAAAGTCAGGGCAGAGC-3'     | F: 5'-ATTGCTTACATTGCTTCTGACAC-3'    |
|            | R: 5'-TGGTGTCTGTTGAGGTTGCTA-3'     | R: 5'-TGGTCTCCTTAAACCTGTCTTGTA-3'   |
|            | 84 pb                              | 187 pb                              |
| <i>HV1</i> | F: 5'-AGTACATAAAAACCCAATCCACATC-3' | F: 5'-TACATTACTGCCAGCCACCA-3'       |
|            | R: 5'-GATGTGTGATAGTTGAGGGTTGAT-3'  | R: 5'-GTTGGTATCCTAGTGGGTGAGG-3'     |
|            | 85 pb                              | 186 pb                              |
| <i>CYB</i> | F: 5'-CCACATCACTCGAGACGTAAAT-3'    | F: 5'-CTAGCCATGCACTACTCACCAG-3'     |
|            | R: 5'-GGAAGAGGCAGATAAAGAATATTGA-3' | R: 5'-TTTCTGAGTAGAGAAATGATCCGTAA-3' |
|            | 86 pb                              | 184 pb                              |

*CYB*: Apocytochrome B; *HBB*: Hemoglobin subunit beta; *HV1*: Hypervariable región 1; F: forward primer; R: reverse primer.

**Table S2.** Ct mean analysis cases vs controls comparing genes and copy number.

| Phase | Gene             | Adjusted <i>p</i><br>Value (*) | Adjusted <i>p</i><br>Value(cn) | Ct Mean Controls ±<br>SD | Ct Mean Patients ±<br>SD | Copies per µl Mean<br>Controls ± SD | Copies per µl Mean<br>Patients ± SD |
|-------|------------------|--------------------------------|--------------------------------|--------------------------|--------------------------|-------------------------------------|-------------------------------------|
| B     | <i>HV1-short</i> | 0.084                          | 0.064                          | 24.79 ± 3.58             | 23.42 ± 3.57             | 1.09 ± 1.18                         | 2.46 ± 3.06                         |
|       | <i>HV1-long</i>  | 0.013                          | 0.008                          | 25.10 ± 4.46             | 22.73 ± 3.97             | 0.90 ± 1.18                         | 2.62 ± 3.07                         |
|       | <i>CYB-short</i> | 0.043                          | 0.007                          | 26.43 ± 3.67             | 24.77 ± 3.69             | 0.69 ± 0.72                         | 2.00 ± 2.43                         |
|       | <i>CYB-long</i>  | 0.014                          | 0.003                          | 27.80 ± 4.91             | 25.11 ± 4.86             | 0.48 ± 0.65                         | 1.67 ± 1.82                         |
|       | <i>HBB-short</i> | 0.512                          | 0.245                          | 32.47 ± 2.29             | 32.82 ± 2.51             | 0.62 ± 0.85                         | 0.76 ± 1.32                         |
|       | <i>HBB-long</i>  | 0.213                          | 0.205                          | 35.72 ± 3.02             | 34.80 ± 3.09             | 0.56 ± 1.91                         | 0.58 ± 1.49                         |
| C     | <i>HV1-short</i> | <0.001                         | 0.001                          | 21.62 ± 2.39             | 19.48 ± 2.32             | 5.93 ± 10.04                        | 18.73 ± 32.15                       |
|       | <i>HV1-long</i>  | <0.001                         | 0.001                          | 20.41 ± 2.55             | 18.30 ± 2.43             | 7.81 ± 13.50                        | 24.54 ± 45.83                       |
|       | <i>CYB-short</i> | 0.001                          | 0.002                          | 22.34 ± 2.79             | 20.28 ± 2.43             | 7.95 ± 12.76                        | 17.82 ± 23.21                       |
|       | <i>CYB-long</i>  | 0.001                          | 0.002                          | 21.69 ± 2.98             | 19.64 ± 2.52             | 8.29 ± 13.60                        | 18.75 ± 27.54                       |
|       | <i>HBB-short</i> | <0.001                         | <0.001                         | 21.74 ± 1.73             | 20.13 ± 2.12             | 209.85 ± 229.09                     | 677.88 ± 1019.3                     |
|       | <i>HBB-long</i>  | 0.102                          | 0.163                          | 32.46 ± 2.42             | 31.58 ± 3.17             | 1.48 ± 3.26                         | 12.77 ± 37.67                       |
| D     | <i>HV1-short</i> | 0.783                          | 0.932                          | 29.37 ± 2.64             | 29.20 ± 2.68             | 0.047 ± 0.06                        | 0.046 ± 0.04                        |
|       | <i>HV1-long</i>  | 0.024                          | 0.003                          | 29.33 ± 2.90             | 27.83 ± 3.06             | 0.08 ± 0.24                         | 0.11 ± 0.18                         |
|       | <i>CYB-short</i> | 0.002                          | 0.003                          | 32.72 ± 3.46             | 30.38 ± 3.31             | 0.022 ± 0.04                        | 0.07 ± 0.08                         |
|       | <i>CYB-long</i>  | 0.001                          | 0.001                          | 33.91 ± 4.88             | 30.49 ± 3.69             | 0.043 ± 0.11                        | 0.05 ± 0.07                         |
|       | <i>HBB-short</i> | 0.050                          | 0.068                          | 34.72 ± 2.83             | 33.39 ± 3.16             | 0.25 ± 0.44                         | 0.66 ± 1.04                         |
|       | <i>HBB-long</i>  | 0.209                          | 0.254                          | 35.22 ± 3.47             | 34.12 ± 3.72             | 0.69 ± 1.96                         | 3.40 ± 10.99                        |
| E     | <i>HV1-short</i> | 0.068                          | 0.026                          | 19.82 ± 12.38            | 24.04 ± 7.54             | 0.39 ± 0.75                         | 0.36 ± 0.47                         |
|       | <i>HV1-long</i>  | 0.020                          | 0.027                          | 26.84 ± 3.24             | 25.34 ± 1.96             | 0.27 ± 0.64                         | 0.27 ± 0.37                         |
|       | <i>CYB-short</i> | 0.002                          | 0.003                          | 27.96 ± 3.96             | 25.34 ± 2.45             | 0.28 ± 0.38                         | 1.09 ± 1.64                         |
|       | <i>CYB-long</i>  | 0.750                          | 0.413                          | 34.34 ± 3.36             | 34.70 ± 4.87             | 0.005 ± 0.009                       | 0.05 ± 1.78                         |
|       | <i>HBB-short</i> | 0.721                          | 0.564                          | 31.58 ± 2.96             | 31.86 ± 3.44             | 0.92 ± 0.57                         | 1.47 ± 2.02                         |
|       | <i>HBB-long</i>  | 0.012                          | 0.012                          | 33.93 ± 3.17             | 35.91 ± 2.71             | 0.75 ± 1.76                         | 0.09 ± 0.13                         |
| F     | <i>HV1-short</i> | <0.001                         | <0.001                         | 25.16 ± 1.29             | 23.79 ± 1.62             | 0.32 ± 0.29                         | 0.87 ± 0.92                         |
|       | <i>HV1-long</i>  | <0.001                         | <0.001                         | 25.82 ± 1.44             | 24.35 ± 1.84             | 0.15 ± 0.14                         | 0.43 ± 0.50                         |
|       | <i>CYB-short</i> | 0.001                          | 0.005                          | 27.95 ± 1.41             | 26.80 ± 1.73             | 0.12 ± 0.11                         | 0.29 ± 0.33                         |
|       | <i>CYB-long</i>  | <0.001                         | <0.001                         | 27.49 ± 1.40             | 26.23 ± 1.66             | 0.11 ± 0.10                         | 0.28 ± 0.35                         |
|       | <i>HBB-short</i> | 0.064                          | 0.120                          | 34.36 ± 2.13             | 33.46 ± 2.27             | 0.17 ± 0.13                         | 0.36 ± 0.45                         |
|       | <i>HBB-long</i>  | 0.098                          | 0.107                          | 33.44 ± 2.28             | 35.58 ± 1.96             | 0.39 ± 0.69                         | 1.22 ± 3.24                         |

Ct: cycle threshold; *CYB*: Apocytochrome B; *HBB*: Hemoglobin subunit beta; *HV1*: Hypervariable region 1; SD: Standard deviation. *HBB* as nuclear marker vs *HV1* and *CYB* as mitochondrial markers. (\*) Just FDR *p* values comparing genes in cases vs controls by qPCR analysis. Adjusted *p* values (cn) represent values of comparisons cases vs controls in copy number by dPCR analysis. The italics indicates significant *p* values.
